# Supplementary material
Source: PubMed Central journal article supplement (PMC3292347)
Supplement: NIHMS357588-supplement-1.pdf [file NIHMS357588-supplement-1.pdf]

Supplemental to Table 2 for Editors: Cumulative alcohol consumption and breast cancer risk for both invasive and insitu carcinoma including In situ carcinoma

| Alcohol<br>(gms/day) | Invasive only |                                               |                              | Invasive and insitu |                                               |                              |
|----------------------|---------------|-----------------------------------------------|------------------------------|---------------------|-----------------------------------------------|------------------------------|
|                      | Cases         | Incidence rate<br>per 100,000<br>person-years | Multivariate RR<br>(95% CI)* | Cases               | Incidence rate<br>per 100,000<br>person-years | Multivariate RR (95%<br>CI)* |
| 0                    | 1669          | 281                                           | 1.0 (ref)                    | 1953                | 328                                           | 1.0 (ref)                    |
| 0.1-4.9              | 3143          | 309                                           | 1.06 (0.99-1.12)             | 3792                | 373                                           | 1.07 (1.01-1.13)             |
| 5-9.9                | 1062          | 332                                           | 1.15 (1.05-1.24)             | 1248                | 391                                           | 1.12 (1.04-1.21)             |
| 10-19.9              | 1092          | 351                                           | 1.22 (1.13-1.32)             | 1270                | 408                                           | 1.20 (1.11-1.29)             |
| 20-29.9              | 362           | 356                                           | 1.20 (1.13-1.32)             | 427                 | 419                                           | 1.19 (1.07-1.33)             |
| ≥30                  | 362           | 413                                           | 1.51 (1.35-1.70),            | 408                 | 465                                           | 1.46 (1.31-1.63)             |
| P for trend          | 7690          | 316                                           | <0.001                       | 9098                | 374                                           | <0.001                       |
